# Supplementary material for: Adapterama III: Quadruple-indexed, double/triple-enzyme RADseq libraries (2RAD/3RAD)
Source: PubMed Central journal article supplement (PMC6791345; doi:10.7717/peerj.7724), 2019-10-11
Supplement: peerj-07-7724-s009.pdf [file peerj-07-7724-s009.pdf]

# Quadruple-Indexed 3RAD Libraries

ACGACGCTCTCCGATCTCCGAATGCTAGXXXXXXXXXXXXAATTACGTTAGAGATCGGAAGAGCACACGTAAATCC  
 TGTGAGAAAGGGATGTGCTGCGAGAAGGCTAGAGGCTTACGATCXXXXXXXXXXXXTTAATGCAATCTCTAGCCTTCTCGTGTGCAGACTTGAGGTCAGTG  
 P

Ligated product

First cycle

ACGACGCTCTCCGATCTCCGAATGCTAGXXXXXXXXXXXXAATTACGTTAGAGATCGGAAGAGCACACGTAAATCC  
 AATGATACGGCGACCACCGAGATCTACACACCGACAAACACTCTTTCCCTAC →  
 TGTGAGAAAGGGATGTGCTGCGAGAAGGCTAGAGGCTTACGATCXXXXXXXXXXXXTTAATGCAATCTCTAGCCTTCTCGTGTGCAGACTTGAGGTCAGTG  
 P

AATGATACGGCGACCACCGAGATCTACACACCGACAAACACTCTTTCCCTACACGACGCTCTCCGATCTCCGAATGCTAGXXXXXXXXXXXXAATTACGTTAGAGATCGGAAGAGCACACGTCTGAATCCAGTCAC  
 TGTGAGAAAGGGATGTGCTGCGAGAAGGCTAGAGGCTTACGATCXXXXXXXXXXXXTTAATGCAATCTCTAGCCTTCTCGTGTGCAGACTTGAGGTCAGTG  
 1st PCR product

Second cycle

AATGATACGGCGACCACCGAGATCTACACACCGACAAACACTCTTTCCCTACACGACGCTCTCCGATCTCCGAATGCTAGXXXXXXXXXXXXAATTACGTTAGAGATCGGAAGAGCACACGTCTGAATCCAGTCAC  
 GACTTGAGGTCAGTG ← TCCAGTGA TAGAGCATA CGGCAGAAGACGAAC  
 iTru5 primer → AATGATACGGCGACCACCGAGATCTACACACCGACAAACACTCTTTCCCTAC  
 TGTGAGAAAGGGATGTGCTGCGAGAAGGCTAGAGGCTTACGATCXXXXXXXXXXXXTTAATGCAATCTCTAGCCTTCTCGTGTGCAGACTTGAGGTCAGTG  
 iTru7 primer

AATGATACGGCGACCACCGAGATCTACACACCGACAAACACTCTTTCCCTACACGACGCTCTCCGATCTCCGAATGCTAGXXXXXXXXXXXXAATTACGTTAGAGATCGGAAGAGCACACGTCTGAATCCAGTCAC  
 TTACTATGCCGCTGGTGGCTTAGATGTGGCTGTTGTGAGAAAGGGATGTGCTGCGAGAAGGCTAGAGGCTTACGATCXXXXXXXXXXXXTTAATGCAATCTCTAGCCTTCTCGTGTGCAGACTTGAGGTCAGTGTCCAGTGA TAGAGCATA CGGCAGAAGACGAAC  
 2nd PCR product

Third cycle

AATGATACGGCGACCACCGAGATCTACACACCGACAAACACTCTTTCCCTACACGACGCTCTCCGATCTCCGAATGCTAGXXXXXXXXXXXXAATTACGTTAGAGATCGGAAGAGCACACGTCTGAATCCAGTCAC  
 GACTTGAGGTCAGTG ← TCCAGTGA TAGAGCATA CGGCAGAAGACGAAC  
 iTru5 primer → AATGATACGGCGACCACCGAGATCTACACACCGACAAACACTCTTTCCCTAC  
 TTACTATGCCGCTGGTGGCTTAGATGTGGCTGTTGTGAGAAAGGGATGTGCTGCGAGAAGGCTAGAGGCTTACGATCXXXXXXXXXXXXTTAATGCAATCTCTAGCCTTCTCGTGTGCAGACTTGAGGTCAGTGTCCAGTGA TAGAGCATA CGGCAGAAGACGAAC  
 iTru7 primer

AATGATACGGCGACCACCGAGATCTACACACCGACAAACACTCTTTCCCTACACGACGCTCTCCGATCTCCGAATGCTAGXXXXXXXXXXXXAATTACGTTAGAGATCGGAAGAGCACACGTCTGAATCCAGTCACAGTCACTTCTCGTATGCCGCTTCTGCTTG  
 TTACTATGCCGCTGGTGGCTTAGATGTGGCTGTTGTGAGAAAGGGATGTGCTGCGAGAAGGCTAGAGGCTTACGATCXXXXXXXXXXXXTTAATGCAATCTCTAGCCTTCTCGTGTGCAGACTTGAGGTCAGTGTCCAGTGA TAGAGCATA CGGCAGAAGACGAAC

Full length 3RAD PCR product
