# Supplementary material for: Adapterama III: Quadruple-indexed, double/triple-enzyme RADseq libraries (2RAD/3RAD)
Source: PeerJ journal article supplement (doi:10.7717/peerj.7724), 2019-10-11

# 3RAD Quadruple-Indexed Libraries

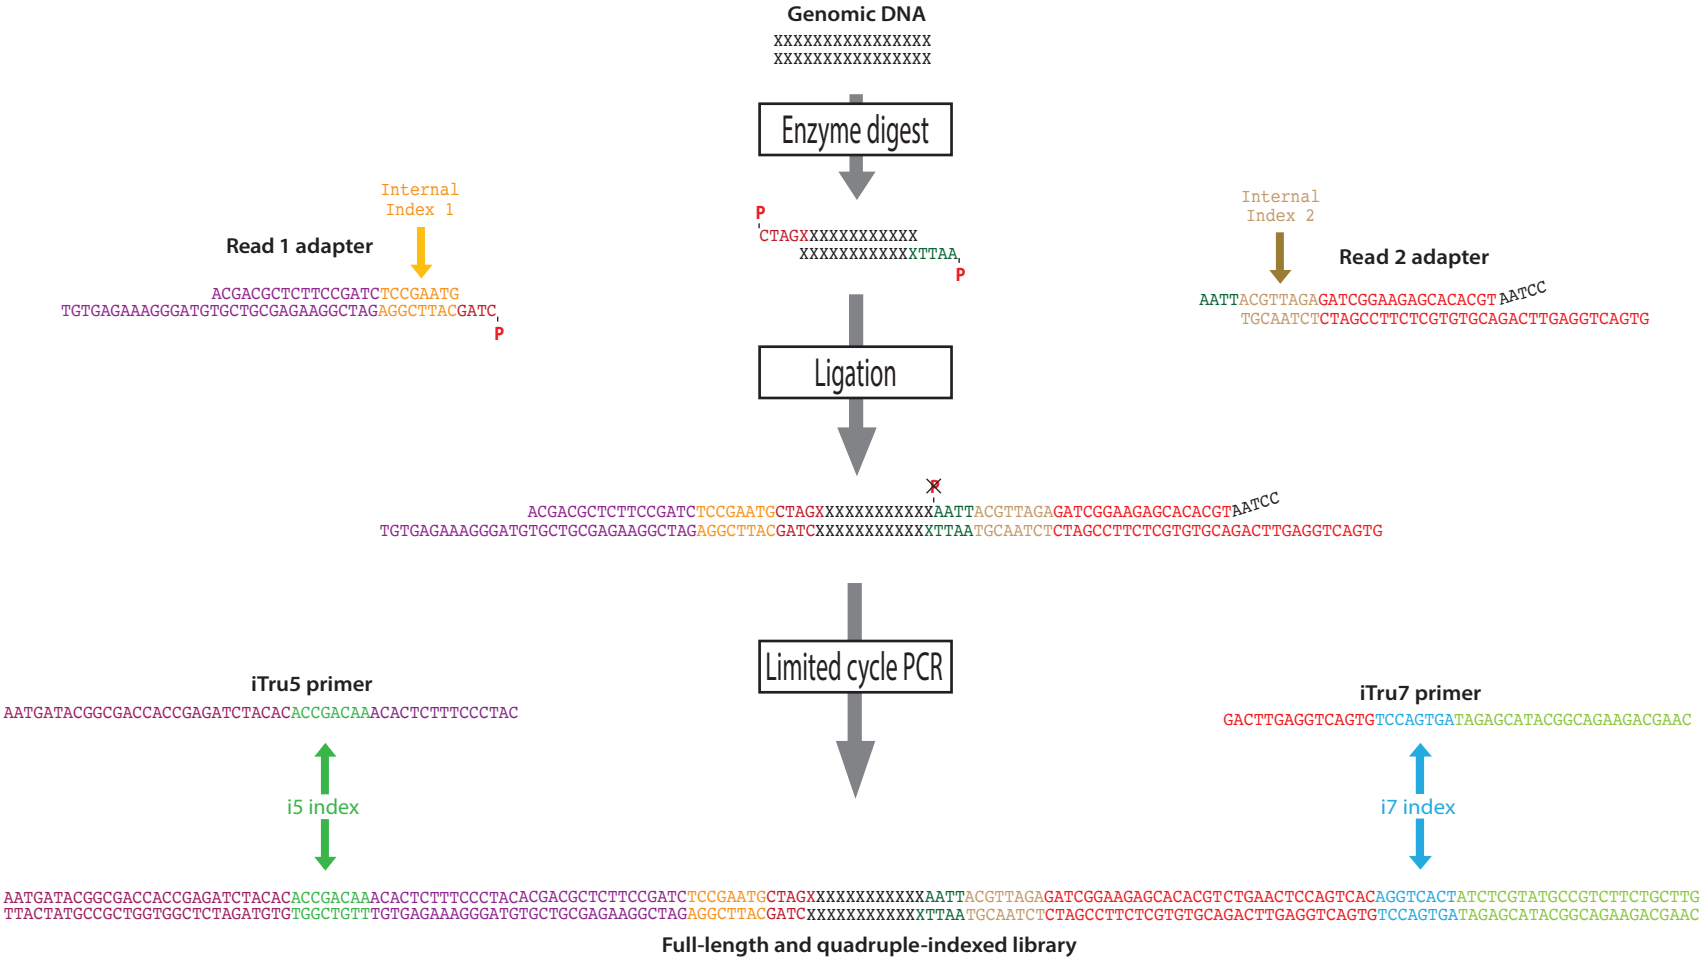

Supplement: Supplemental_Figure_S1.pdf [file Supplemental_Figure_S1.pdf]
